# Supplementary material for: A New, Objective, Quantitative Scale for Measuring Local Skin Responses Following Topical Actinic Keratosis Therapy with Ingenol Mebutate
Source: Springer Nature journal article supplement (doi:10.1007/s13555-014-0059-9), 2014-07-29
Supplement: MOESM1 [file 9271044]

- A new scale was developed to quantitatively and objectively assess the six most common local skin responses (LSRs) resulting from topical actinic keratosis (AK) therapy.
- The LSR grading scale uses a 0-4 numerical rating, with clinical descriptors and representative photographic images for each rating.
- The use of the scale was assessed in four phase III clinical studies of ingenol mebutate.
- The scale provided the ability to rate each LSR category (erythema, flaking/scaling, crusting, swelling, vesiculation/pustulation, and erosion/ulceration) and generate a composite objective LSR score.
- The new scale provides dermatologists with a useful tool to compare the tolerability of current and future therapeutic modalities for AK in clinical trials and, potentially, real-world practice settings.

This summary slide represents the opinions of the authors. Sponsorship for this study was funded by LEO Pharma A/S (Ballerup, Denmark). Medical writing assistance for this study was provided by Paula Michelle del Rosario of iMed Comms (Macclesfield, UK). For a full list of acknowledgments and conflicts of interest for all authors of this article, please see the full text online. Copyright © The Authors 2014. Creative Commons Attribution Noncommercial License (CC BY-NC).
